# Supplementary material
Source: HighWire-hosted journal article supplement (https://jnis.bmj.com/content/14/5/neurintsurg-2021-017441)
Supplement: inline-supplementary-material-1 [file inline-supplementary-material-1.pdf]

SUPPLEMENTAL MATERIAL

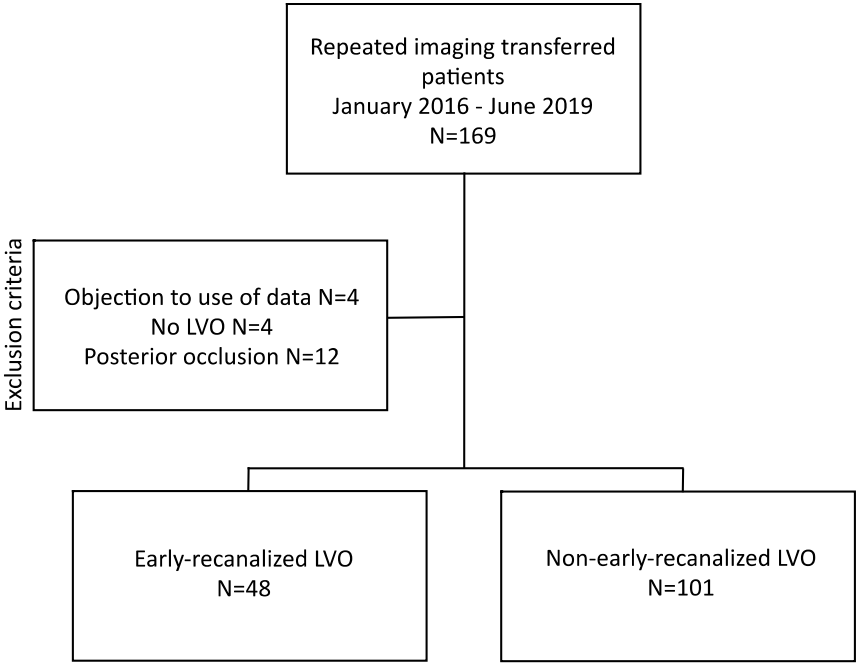

**Supplemental Figure 1:** Inclusion flow chart. The abbreviation stands for: LVO, large vessel occlusion.

**Supplemental Table 1:** Baseline characteristics for ER-LVO and NER-LVO patients that received intravenous treatment with alteplase (IVT).

| Baseline clinical characteristics* - IVT subgroup           | ER-LVO, n=42        | NER-LVO, n=79     | p-value         |
|-------------------------------------------------------------|---------------------|-------------------|-----------------|
| Age – median (IQR)                                          | 74 (59-84)          | 72 (59-84)        | 0.92            |
| Sex, female – no./ total (%)                                | 23/42 (55%)         | 42/79 (53%)       | 0.87            |
| Medical history – no./total (%)                             |                     |                   |                 |
| Previous stroke                                             | 6/42 (14%)          | 12/79 (15%)       | 0.89            |
| Diabetes mellitus                                           | 7/42 (17%)          | 10/79 (13%)       | 0.55            |
| Coronary artery disease                                     | 1/42 (2%)           | 6/79 (8%)         | 0.24            |
| Hypertension                                                | 12/42 (29%)         | 37/79 (47%)       | 0.05            |
| Atrial fibrillation                                         | 7/42 (17%)          | 14/79 (18%)       | 0.88            |
| Pre-stroke mRS – no./total (%)                              |                     |                   | 0.75            |
| 0                                                           | 6/16 (38%)          | 9/32 (28%)        |                 |
| 1                                                           | 9/16 (56%)          | 21/32 (66%)       |                 |
| 2                                                           | 0/16 (0%)           | 1/32 (3%)         |                 |
| 3                                                           | 1 /16 (6%)          | 1/32 (3%)         |                 |
| Systolic blood pressure <sup>§</sup> [mmHg] – median (IQR)  | 143 (130-163)       | 148 (125-166)     | 0.98            |
| Diastolic blood pressure <sup>§</sup> [mmHg] – median (IQR) | 80 (70-90)          | 83 (71-90)        | 0.56            |
| Pulse pressure <sup>§</sup> [mmHg] median (IQR)             | 69 (49-80)          | 62 (48-79)        | 0.70            |
| NIHSS <sub>PSC</sub> <sup>†</sup> – median (IQR)            | 10 (7-15)           | 12 (8-17)         | 0.36            |
| NIHSS <sub>CSC</sub> <sup>‡</sup> – median (IQR)            | <b>4 (1-9)</b>      | <b>14 (7-20)</b>  | <b>&lt;0.01</b> |
| ΔNIHSS <sup>†</sup> – median (IQR)                          | <b>-5 (-3-(-8))</b> | <b>3 (7-(-2))</b> | <b>&lt;0.01</b> |

CSC, comprehensive stroke center; ΔNIHSS, change in NIHSS score between presentation to the PSC and presentation to the CSC; ER-LVO, early-recanalized large vessel occlusion; IVT, intravenous treatment with alteplase; mRS, modified Rankin scale; NER-LVO, non-early-recanalized large vessel occlusion; NIHSS, National Institutes of Health Stroke Scale; NIHSS<sub>CSC</sub>, NIHSS on CSC admission; NIHSS<sub>PSC</sub>, NIHSS on PSC admission; PSC, primary stroke center.

\*All baseline characteristics were measured on arrival at the CSC, unless reported otherwise.

Number of missing values: <sup>†</sup>7, <sup>‡</sup>2, <sup>§</sup>4.

**Supplemental Table 2:** Thrombus imaging characteristics at baseline CT imaging for ER-LVO and NER-LVO patients that received intravenous treatment with alteplase (IVT).

| Thrombus imaging characteristics – IVT subgroup | ER-LVO, n=42       | NER-LVO, n=79      | p-value         |
|-------------------------------------------------|--------------------|--------------------|-----------------|
| Occlusion location – no./total (%)              |                    |                    |                 |
| ICA                                             | <b>0/42 (0%)</b>   | <b>22/79 (28%)</b> | <b>&lt;0.01</b> |
| M1                                              | 27/42 (64%)        | 44/79 (56%)        | 0.36            |
| M2                                              | <b>15/42 (36%)</b> | <b>13/79 (16%)</b> | <b>0.02</b>     |
| DT [mm] – median (IQR)                          | <b>27 (15-33)</b>  | <b>10 (0-22)</b>   | <b>&lt;0.01</b> |
| Thrombus length [mm] – median (IQR)             | <b>16 (10-19)</b>  | <b>28 (16-48)</b>  | <b>&lt;0.01</b> |
| Thrombus perviousness [HU] – median (IQR)       | 13.5 (7.7-27.8)    | 12.3 (0.7-22.0)    | 0.30            |
| Thrombus attenuation [HU] – median (IQR)        | 42.8 (37.8-47.6)   | 46.4 (36.2-56.1)   | 0.35            |
| CBS – median (IQR)                              | <b>8 (7-9)</b>     | <b>6 (5-8)</b>     | <b>&lt;0.01</b> |

CBS, clot burden score; DT, distance from terminus of intracranial carotid artery to the thrombus; ER-LVO, early-recanalized large vessel occlusion; ICA, internal carotid artery; M1, middle cerebral artery M1 segment; M2, middle cerebral artery M2 segment; NER-LVO, non-early-recanalized large vessel occlusion.

Occlusion location was assessed in all 121 patients. DT was measured in 107/121 patients, thrombus length in 95/121, thrombus density and perviousness in 58/121, and CBS in 101/121.

**Supplemental Table 3:** Workflow-related time metrics for ER-LVO and NER-LVO patients.

| Workflow-related time metrics                                     | ER-LVO,<br>n=48 | NER-LVO,<br>n=101 | p-value |
|-------------------------------------------------------------------|-----------------|-------------------|---------|
| Onset to door time* [min] – median (IQR)                          | 48 (37-118)     | 55 (38-90)        | 0.91    |
| Onset to needle time <sup>†</sup> [min] – median (IQR)            | 65 (47-71)      | 83 (58-116)       | 0.35    |
| Door to needle time <sup>‡</sup> [min] – median (IQR)             | 20 (20-21)      | 23 (18-30)        | 0.44    |
| PSC imaging to CSC imaging time <sup>§</sup> [min] – median (IQR) | 90 (74-114)     | 93 (72-124)       | 0.25    |

CSC, comprehensive stroke center; Door to needle time, time from arrival at the PSC to IVT initiation; ER-LVO, early-recanalized large vessel occlusion; NER-LVO, non-early-recanalized large vessel occlusion; Onset to door time, time from stroke onset to arrival at the PSC; Onset to needle time, time from stroke onset to IVT initiation; PSC, primary stroke center; PSC imaging to CSC imaging time, time difference between the imaging taken at the PSC and the repeated imaging performed at the CSC.

Number of missing values: \*83, <sup>†</sup>96, <sup>‡</sup>109, <sup>§</sup>19.
